# Supplementary material
Source: PubMed Central journal article supplement (PMC2804164)
Supplement: supp_M109.065862_jbc.M109.065862-1.pdf [file supp_M109.065862_jbc.M109.065862-1.pdf]

**Additional sex comb-like 1 represses RAR-mediated transcription through associating with heterochromatin protein 1 and lysine-specific demethylase 1\***

Sang-Wang Lee,<sup>1</sup> Yang-Sook Cho,<sup>1</sup> Jung-Min Na,<sup>1</sup> Ui-Hyun Park,<sup>1</sup> Myengmo Kang,<sup>1</sup> Eun-Joo Kim,<sup>2†</sup> and Soo-Jong Um<sup>1†</sup>

<sup>1</sup>Department of Bioscience and Biotechnology, Sejong University, 98 Kunja-dong, Kwangjin-gu, Seoul 143-747, Korea

<sup>2</sup>Department of Molecular Biology, Dankook University, 126 Jukjeon-dong, Suji-gu, Yongin-si, Gyeonggi-do 448-701, Korea

**Running title: ASXL1 is a novel corepressor of RAR**

<sup>†</sup>To whom correspondence should be addressed. Tel: +82 2 3408 3641, Fax: +82 2 3408 4334, Email: umsj@sejong.ac.kr. Correspondence may also be addressed to Eun-Joo Kim. Tel: +82 31 8005 3198, Fax: +82 31 8005 3191, Email: nbrejk@dankook.ac.kr

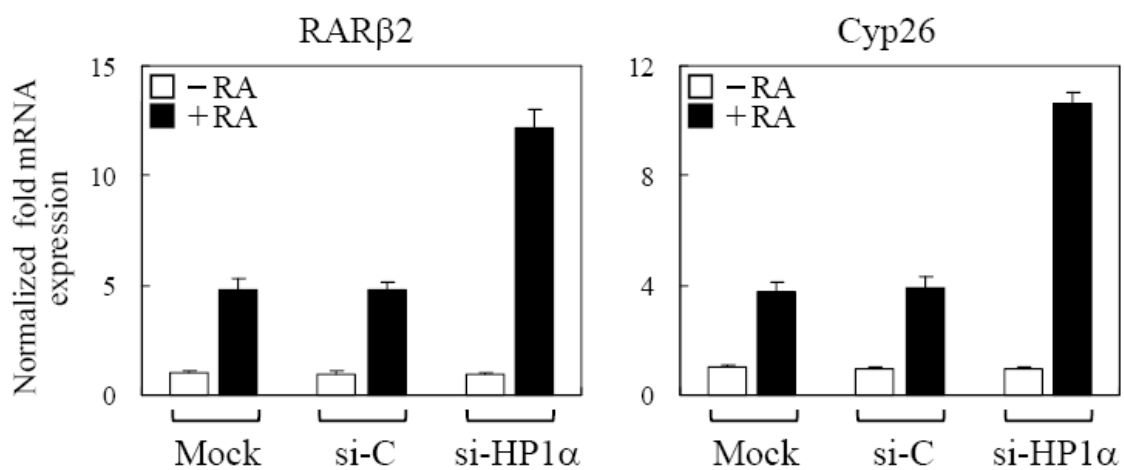

Supplemental Fig. 1. Effect of HP1 $\alpha$  knockdown on the expression of the endogenous RA-responsive *RARβ2* and *Cyp26* genes. Total RNA was extracted from HEK293 cells transfected with mock, control siRNA (si-C) or HP1 $\alpha$ -specific siRNA (si-HP1 $\alpha$ ) and subjected to reverse transcription. The cDNA was then quantified by real-time PCR using primer sets for *RARβ2* and *Cyp26* coding sequences shown in Experimental Procedures. Data are the averages of three independent experiments (mean  $\pm$  SD).
